# Supplementary material for: Effects of the Insulted Neuronal Cells-Derived Extracellular Vesicles on the Survival of Umbilical Cord-Derived Mesenchymal Stem Cells following Cerebral Ischemia/Reperfusion Injury
Source: PubMed Central journal article supplement (PMC7382764; doi:10.1155/2020/9768713), 2020-07-16
Supplement: 9768713.f1.pdf [file 9768713.f1.pdf]

## Supplementary materials

Supplementary Table1. Primary and secondary antibodies

| Primary antibodies       |                  |              |               |             |
|--------------------------|------------------|--------------|---------------|-------------|
| Product name             | Catalogue Number | Host species | Concentration | Supplier    |
| cleaved caspase3         | ab49822          | Rabbit       | 1: 500        | Abcam       |
| cleaved-caspase9         | 10380-1-AP       | Rabbit       | 1: 400        | Proteintech |
| cytochrome C             | 10993-1-AP       | Rabbit       | 1: 750        | Proteintech |
| Rab27a                   | ab55667          | Mouse        | 1: 1000       | Abcam       |
| HIF-1 $\alpha$           | 20960-1-AP       | Rabbit       | 1:750         | Proteintech |
| BAX                      | 50599-2-Ig       | Rabbit       | 1: 5000       | Proteintech |
| BCL-2                    | 60178-1-Ig       | Mouse        | 1: 4000       | Proteintech |
| CD9                      | 60232-1-Ig       | Mouse        | 1: 2000       | Proteintech |
| CD63                     | 25682-1-AP       | Rabbit       | 1: 500        | Proteintech |
| CD81                     | ab109201         | Rabbit       | 1: 4000       | Abcam       |
| TSG101                   | 14497-1-AP       | Rabbit       | 1: 2000       | Proteintech |
| Calnexin                 | 66903-1-Ig       | Mouse        | 1: 10000      | Proteintech |
| $\beta$ -actin           | 60008-1-Ig       | Mouse        | 1: 5000       | Proteintech |
| Secondary antibodies     |                  |              |               |             |
| HRP goat anti-mouse IgG  | SA00001-1        |              | 1: 5000       | Proteintech |
| HRP goat anti-rabbit IgG | SA00001-2        |              | 1: 6000       | Proteintech |

## Supplementary Figure1

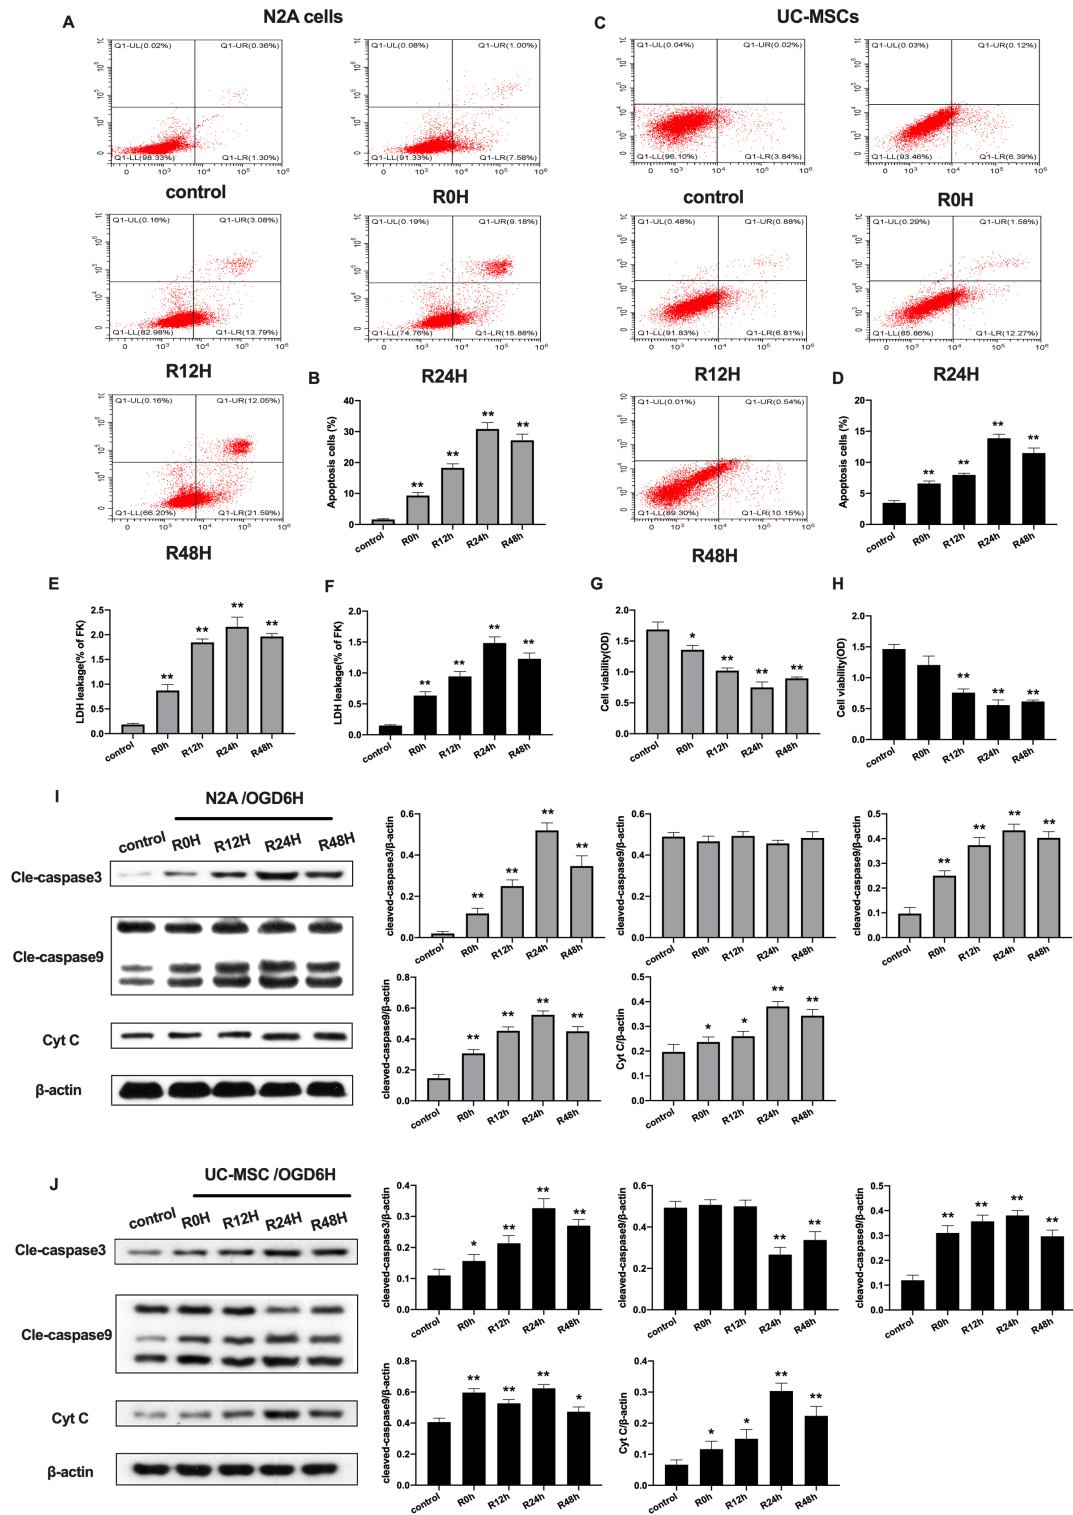

**Supplementary Figure 1 OGD/R induced apoptosis of N2A cells and UC-MSCs during reperfusion in a time-dependent manner.** N2A cells and UC-MSCs were subjected to OGD/R insult. (A-D) Apoptosis of N2A cells and UC-MSCs as evaluated by flow cytometry with Annexin-V/PI staining assay. (E-F) Apoptosis of N2A cells and UC-MSCs as evaluated by LDH leakage assay. (G-H) Cell viability of N2A cells and UC-MSCs as evaluated by MTT assay. (I-J) Expression

of cleaved-caspase3, cleaved-caspase9 and cytochrome C in N2A cells and UC-MSCs as evaluated by western blotting. All data are presented as the mean value  $\pm$ SD(n=3). \*p<0.05; \*\*p<0.01, compared with control group.

### Supplementary Figure2

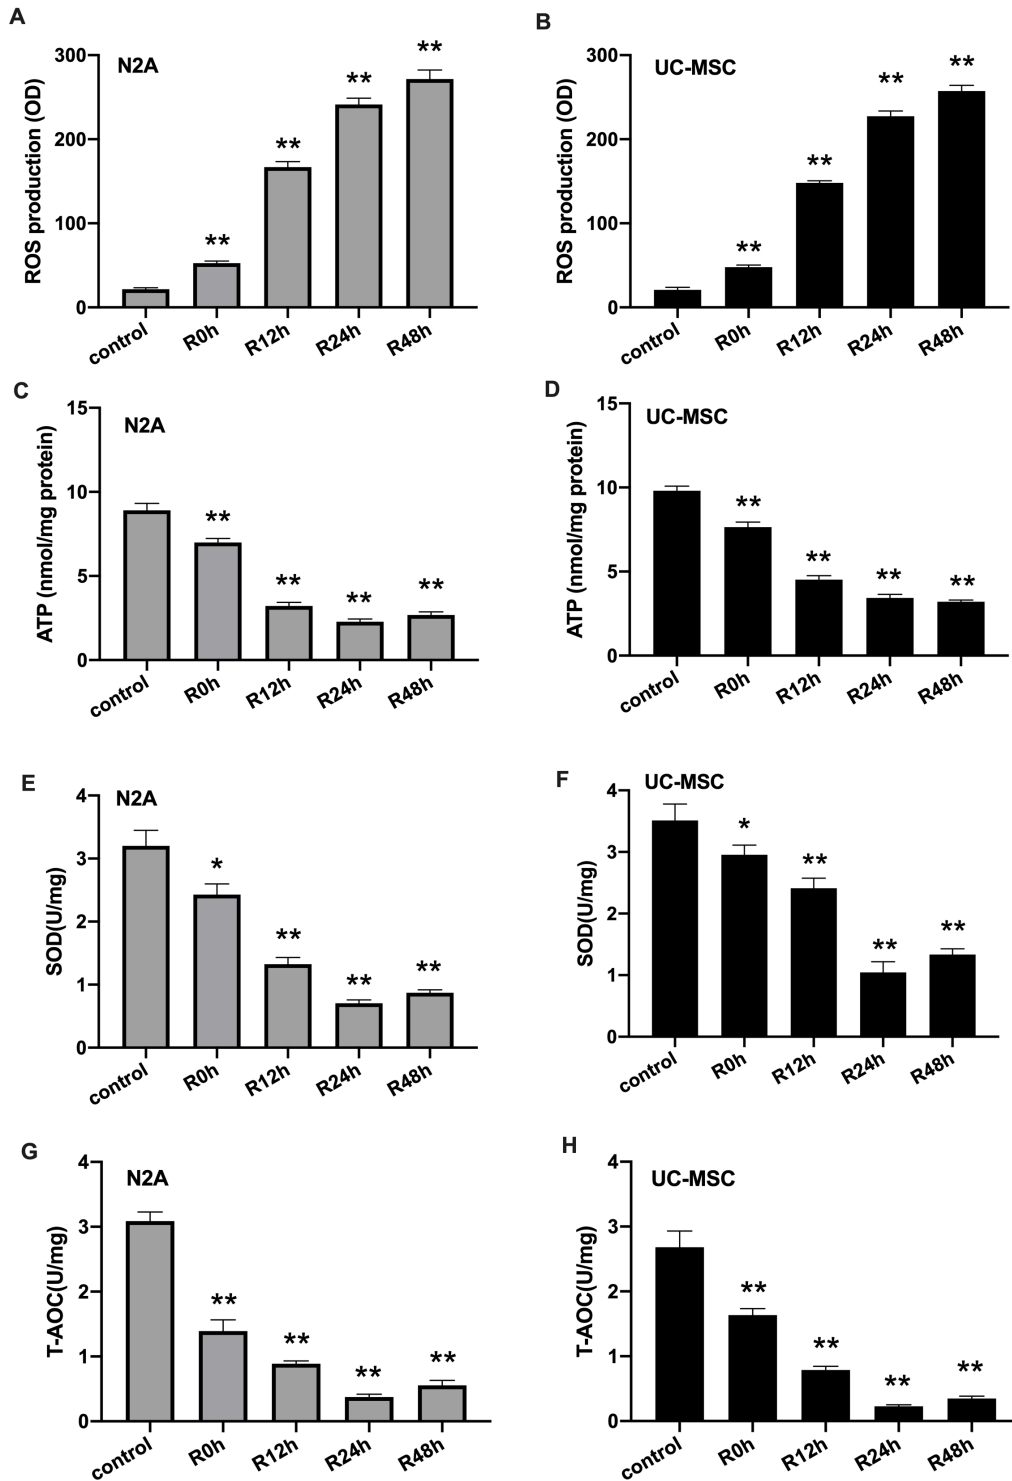

Supplementary Figure 2 OGD/R induced oxidative stress in N2A cells and UC-MSCs during

**reperfusion in a time-dependent manner.** N2A cells and UC-MSCs were subjected to OGD/R insult. (A-B) Levels of ROS in N2A cells and UC-MSCs as determined by dihydroethidium-DCFH-DA assay. (C-D) Levels of ATP in N2A cells and UC-MSCs as determined by firefly luciferase assay.(E-F) Levels of SOD in N2A cells and UC-MSCs as determined by WST-8 assay. (G-H) Levels of T-AOC in N2A cells and UC-MSCs as determined by ABTS assay. All data are presented as the mean value  $\pm$ SD(n=3). \*p<0.05; \*\*p<0.01, compared with control group.
